# Supplementary material for: Photoelectric and flexible poly(styrene-b-ethylene/butylene-b-styrene)-zinc porphyrin–graphene hybrid composite: synthesis, performance, and mechanism
Source: Royal Society of Chemistry journal article supplement (doi:10.1039/c8ra07003b), 2018-01-01
Supplement: c8ra07003b2.pdf [file c8ra07003b2.pdf]

# Supporting Information

## **Photoelectric and Flexible poly (styrene-*b*-ethylene/butylene-*b*-styrene)-Zinc porphyrin- graphene hybrid composite: synthesis, performance, and mechanism**

Shumei Tang, Yu Xu, Gehong Su, Jianjun Bao and Aimin Zhang\*

State Key Laboratory of Polymer Materials Engineering of China, Polymer Research  
Institute of Sichuan University, Chengdu 610065, China

\*Corresponding author: Aimin Zhang (Email: zhangaimin@scu.edu.cn)

## 1. XPS Characterization of Graphene

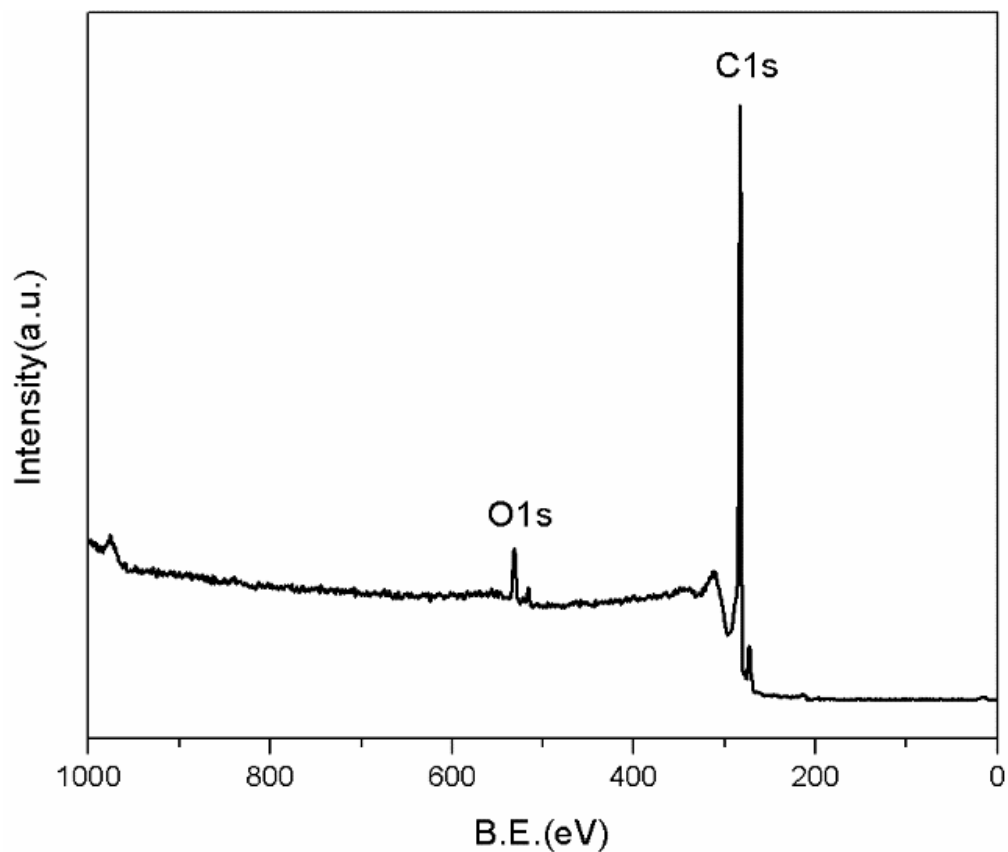

**Fig. S1** XPS spectra of Graphene

Table S1 Element contents of Graphene calculated based on the XPS spectra in Fig. s1

| Sample   | Element content/% |       |
|----------|-------------------|-------|
|          | C                 | O     |
| Graphene | 96.31%            | 3.69% |

A typical XPS spectrum shows that mechanically exfoliated graphene is composed of 96.31% carbon and 3.69% oxygen and does not contain any heteroatoms.

## 2. Raman Characterization of Graphene

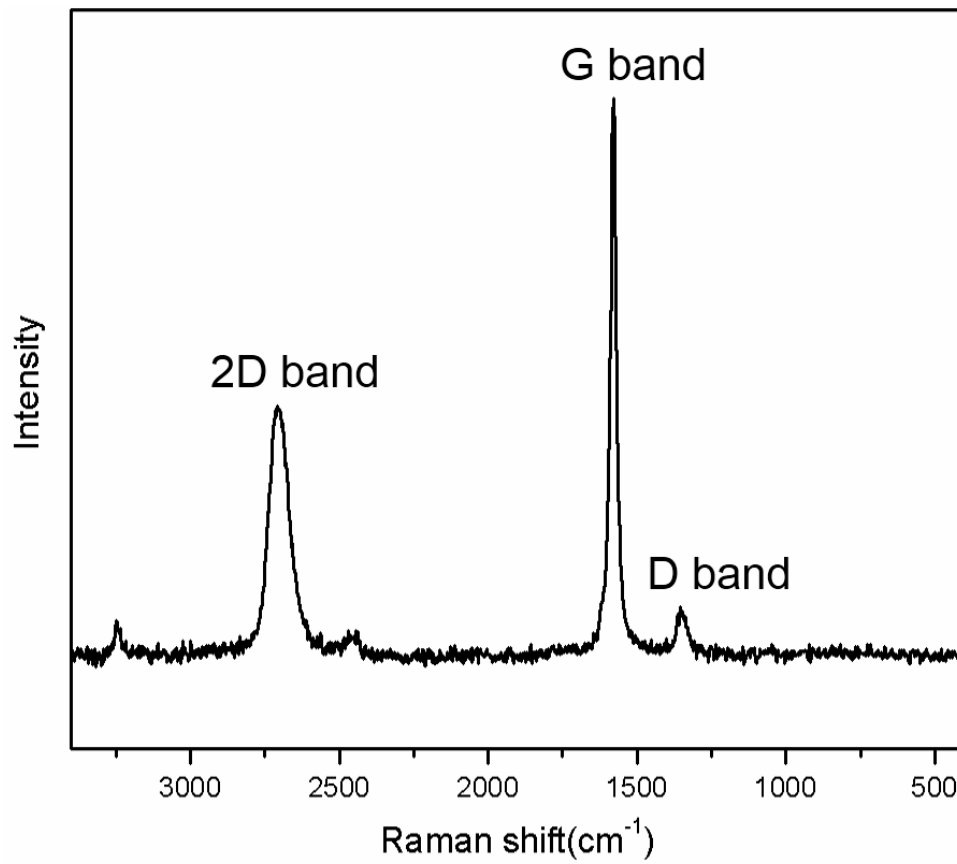

**Fig. S2** Raman spectra of Graphene

A typical Raman spectrum shows the sheet structure of graphene and without much defects.<sup>1</sup>

### 3. Porphyrinization degree

Porphyrinization degree is calculated by the equation below:

$$G = \frac{5S_{-NH}}{S_{-NH} + 2S_{\text{benzene}}}$$

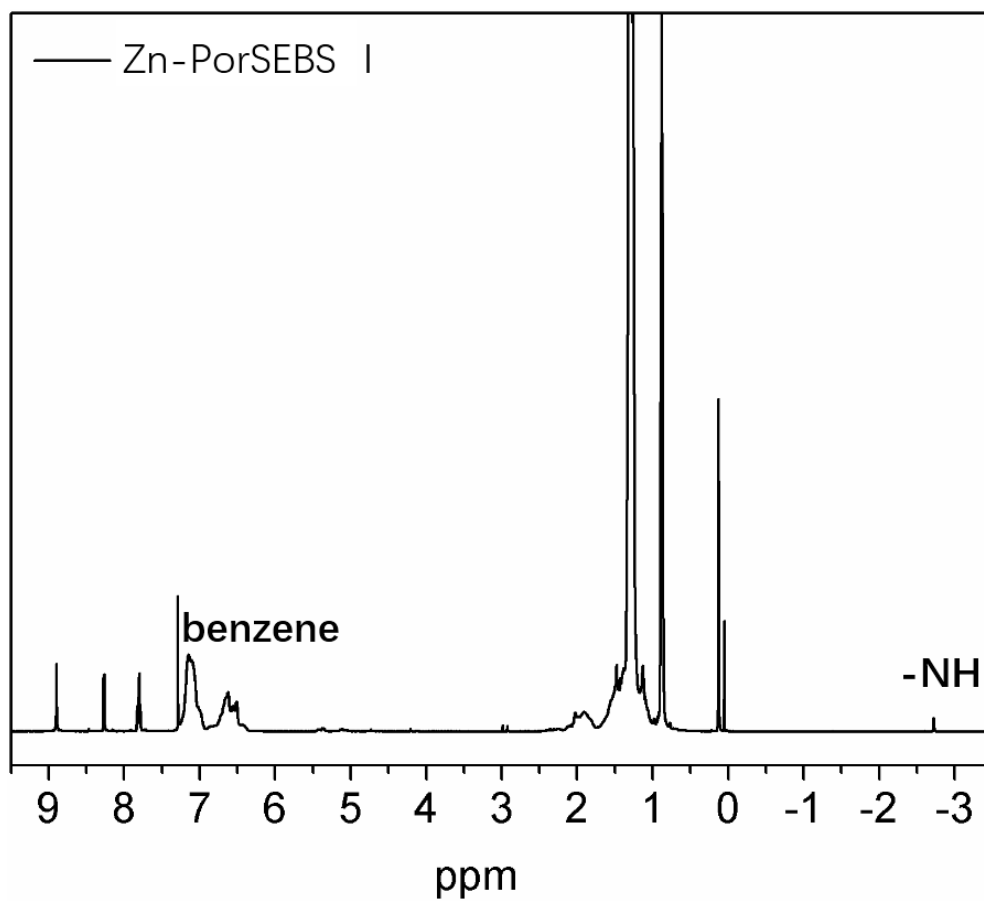

Fig. S3 <sup>1</sup>H-NMR spectra of Zn-PorSEBS I

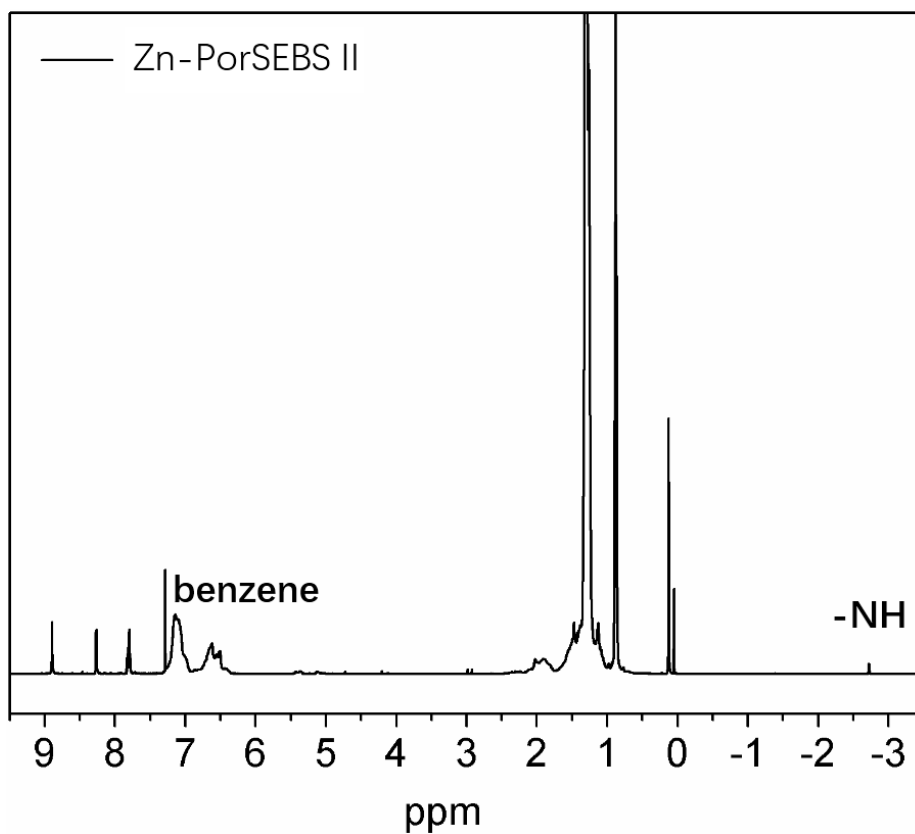

**Fig. S4**  $^1\text{H}$ -NMR spectra of Zn-PorSEBS II

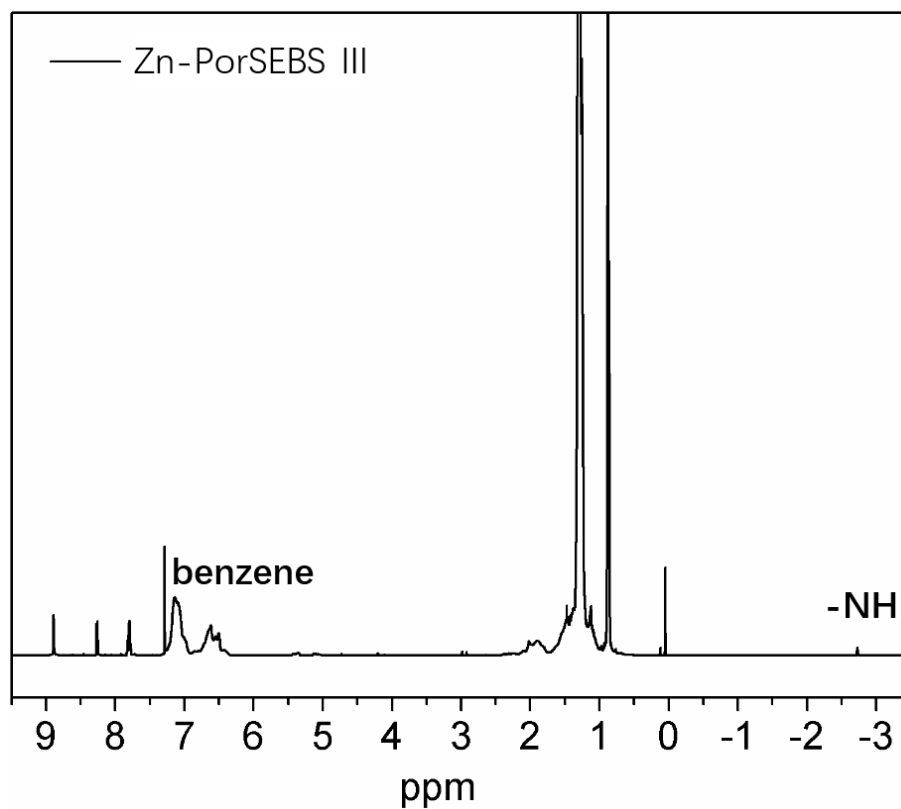

**Fig. S5**  $^1\text{H}$ -NMR spectra of Zn-PorSEBS III

**Table S2** Summary of chloromethylation degree of Zn-PorSEBS

| Samples                      | Zn-PorSEBS I | Zn-PorSEBS II | Zn-PorSEBS III |
|------------------------------|--------------|---------------|----------------|
| Chloromethylation degree (%) | 7.2%         | 10.9%         | 13.6%          |

## References:

1. E. J. Heller, Y. Yang, L. Kocia, W. Chen, S. Fang, M. Borunda and E. Kaxiras, *Acs Nano*, 2016, **10**, 2803-2818.
